# Supplementary material for: Positional Cloning of a Type 2 Diabetes Quantitative Trait Locus; Tomosyn-2, a Negative Regulator of Insulin Secretion
Source: PLoS Genet. 2011 Oct 6;7(10):e1002323. doi: 10.1371/journal.pgen.1002323 (PMC3188574; doi:10.1371/journal.pgen.1002323)
Supplement: Dataset S1 — SNPs and DIPs in QTL Region. Single nucleotide polymorphisms and deletion/insertion polymorphisms (DIPs) in the 36–38.5 Mb region underlying the chromosome 16 QTL were determined by Next Generation sequencing. Using the CLC Genomics 4.0.3 software, for each strain (B6, BTBR, B6.16BT36–38, B6.16BT24–37, and B6.16BT24–38), an algorithm generated a list of SNPs/DIPs using published C57BL/6J sequence as the reference. The algorithm generated a frequency of the SNP/DIP call and only those above 90% were chosen. From there, we sorted the SNPs/DIPs for each strain, and only chose those SNPs/DIPs that were confirmed in at least 3 strains (either one allele for B6 and two for BTBR or vice versa). They also had to agree with what we already knew from our marker and SNP typing (see Supplemental File S1). At that point, to test the validity of the algorithm-generated list, for those that we call “confirmed” by “manual base reading”, we went back to the 4x106 bp sequence that was generated from each strain and confirmed by looking at the numerous reads at each bp call, that this was in fact a real SNP/DIP. We were unable to do this for all SNPs due to time and money constraints, but the accuracy of the algorithm was very good once we placed the above thresholds on the data. The three coding SNPs were not de novo discoveries (although they are not listed in all SNP databases) and were also confirmed via Sanger sequencing in our strains. We cannot say how many were de novo discoveries because the SNP data available for BTBR is very sparse and we have found it to be inaccurate. Previous to embarking on this large-scale sequencing, we used Sanger sequencing to test over 50 published B6 versus BTBR SNPs from the JAX database and found that they were not different between our B6 and BTBR strains; hence the reason for us to do the large-scale sequencing. The DIPs that were discovered were most likely de novo discoveries, because we are unaware that such data exists for DIPs between mou [file pgen.1002323.s001.xls]

## Sheet: Sheet1
Typing of B6 or BTBR allele (only were tested at those SNPs or markers if there is a B6 or BT in the box, all others were assumed) BTBR introgression highlighted
Marker or SNP/DIP	Mb (Build 37)			B6.16B6	B6.16BT	B6.16BT37-55	B6.16BT24-55	B6.16BT24-47	B6.16BT24-37	B6.16BT24-38	B6.16BT36-38
rs4152386	3987018			B6	BT	B6	B6
rs4153507	5786396			B6	BT
rs4154322	6124729			B6	BT
rs4155438	6548997			B6	BT
rs4156937	7125608			B6	BT
rs4160785	10420363			B6	BT
rs4161854	11474012			B6	BT
D16Mit100	12095265			B6	BT	B6	B6
rs4165069	17663457			B6	BT
rs4165280	21339077			B6	BT
rs4165290	22124328			B6	BT
D16Wisc65-2	23.74-24.32			B6	BT	B6	B6
rs4165446	24347804			B6	BT		B6	B6	B6	B6
D16Wisc8	29.25-29.9			B6	BT	B6	BT	BT	BT	BT
rs4169254	31613181			B6	BT
rs3676973	32425578			B6	BT
rs4171250	33124712			B6	BT				BT	BT	B6
rs3666253	33979778			B6	BT	B6	BT	BT	BT
D16Mit104	35018304			B6	BT				BT		B6
rs3713595	35833267			B6	BT	B6	BT	BT	BT		B6
rs4173519	36098603			B6	BT				BT		B6
rs4173627	36353269			B6	BT				BT	BT	B6
rs50751634 (slc15a2)	36772531			B6	BT				B6	BT	BT
D16Mit99	36880955			B6	BT				B6	BT	BT
rs4173870 (hcls1)	36946778			B6	BT				B6	BT	BT
stxbp5l	37115028-37385048 bp, - strand
rs4173885(stxbp5l)	37134466			B6	BT	B6	BT		B6	BT	BT
rs4231211	37572343			B6	BT	B6	BT	BT		BT	BT
rs4174129	37575029			B6	BT	B6
rs4174130	37577796			B6	BT	B6
rs4174138	37591610			B6	BT	B6
rs4174139	37591688			B6	BT	B6
rs32633026	37646385			B6	BT	B6					BT
DIP37.7	37715611			B6	BT	BT					BT
rs47835865	37915151			B6	BT	BT					BT
rs4174190	37917253			B6	BT	BT
rs4174196	37918913			B6	BT	BT			B6	BT	BT
SNP in Nr1i2	38281134			B6	BT						BT
SNP in Nr1i2	38281254			B6	BT						B6
rs4174527	38395906			B6	BT	BT			B6	B6	B6
D16Mit59	38433970			B6	BT					B6
D16Mit12	39118134			B6	BT	BT	BT	BT
D16Mit136	40656301			B6	BT	BT	BT	BT
rs4178635	41789776			B6	BT				B6	B6	B6
D16Mit125	42377567			B6	BT	BT	BT	BT
rs4179271	43733355			B6	BT
rs4179469	44109643			B6	BT
rs4179782	44430473			B6	BT
rs4180119	44657090			B6	BT
rs6282770	45033803			B6	BT
rs4181003	45375511			B6	BT
D16Mit138	45690750			B6	BT	BT	BT	BT
rs3687811	47489432			B6	BT			B6
rs4184812	49600426			B6	BT			B6
D16Mit196	49662930			B6	BT	BT	BT	B6
rs4185643	50300999			B6	BT
rs4186160	50745628			B6	BT
D16Mit168	51298610			B6	BT	BT	BT
rs4186801	51465652			B6	BT	BT
rs6317860	52146506			B6	BT	BT
rs6164817	53030825			B6	BT	BT	BT
rs6323896	53279600			B6	BT	BT	BT
rs4187220	54901204			B6	BT	B6	B6
rs4187972	55844805
rs4151934	55975926			B6	BT	B6	B6
D16Mit171	56294978			B6	BT	B6	B6
D16Mit5	57773677			B6	BT	B6	B6
rs6341030	61851003
rs4195934	64093644
rs4197416	66406352			B6	BT
rs4197723	67363250			B6	BT
rs3700201	69653729			B6	BT
rs4199195	69759388			B6	BT
rs4199250	69796443			B6	BT
D16Mit114	72502005			B6	BT	B6	B6
rs4202399(robo1)	72972555			B6	BT
rs4202847	73316717			B6	BT
rs4204353	74375492			B6	BT
rs4206217	76301337			B6	BT
D16Mit49	78218683			B6	BT	B6	B6
D16Mit158	80530693			B6	BT	B6	B6
rs3164088	96537690			B6	BT
D16Mit106	98051757			B6	BT
